# Supplementary material for: Effects of mechanical and chemical control on invasive Spartina alterniflora in the Yellow River Delta, China
Source: PeerJ. 2019 Sep 3;7:e7655. doi: 10.7717/peerj.7655 (PMC6730535; doi:10.7717/peerj.7655)
Supplement: Supplemental Information 1 [file peerj-07-7655-s001.xlsx]

## Sheet: Fig2
			Mowing in June							Mowing in August
		Density (stems/m2)								Density (stems/m2)
Date	replicate	0cm	10cm	20cm	30cm	40cm				10cm	20cm	30cm	40cm
2017-04-24	1	240
	2	157
	3	289
	4	311
	5	254
	6	233
2017-05-10	1				424.187	530.233						556.745	291.628
	2	331.396	623.024	331.396	172.326	331.396				543.489	477.21	238.605	198.837
	3	437.442	251.861	384.419	543.489	357.907				331.396	424.187	212.093	198.837
	4	198.837	384.419	159.07	596.512	490.466				278.372	397.675	477.21	357.907
	5	490.466	516.977	357.907	318.14	238.605				556.745	490.466	225.349	331.396
	6	424.187	318.14	556.745	384.419	278.372				318.14	556.745	318.14	463.954
2017-05-10	mean	376.466	418.884	357.907	406.512	371.163				405.628	469.256	338.024	307.093
	SE	51.2711	67.2791	63.4344	62.8003	47.4255				59.666	27.679	59.4545	41.4149
2017-06-11	1	238.605	357.907	331.396	357.907	357.907				304.884	225.349	291.628	278.372
	2	119.302	490.466	212.093	119.302	185.582				556.745	238.605	119.302	106.047
	3	291.628	185.582	278.372	106.047	172.326				357.907	296.047	225.349	384.419
	4	185.582	185.582	106.047	291.628	291.628				198.837	225.349	159.07	172.326
	5	318.14	410.931	278.372	132.558	132.558				371.163	225.349	159.07	132.558
	6	291.628	397.675	437.442	185.582	212.093				331.396	251.861	251.861	238.605
2017-06-11	mean	240.814	338.024	273.954	198.837	225.349				353.489	243.76	201.047	218.721
	SE	31.072	51.3111	45.4924	42.1972	34.2264				47.7537	11.3181	26.8228	42.3011
2017-07-08	1		0	0	13.2558	0				0	0	0	0
	2		0	0	0	0				0	0	0	0
	3		0	0	0	0				0	0	0	0
	4		0	0	0	0				0	0	0	0
	5	450.698	26.5117	0	0	0				543.489	39.7675	132.558	106.047
	6	304.884	26.5117	26.5117	0	0				304.884	265.117	198.837	0
2017-07-08	mean	377.791	8.83722	4.41861	2.20931	0				141.396	50.814	55.2326	17.6744
	SE	72.9071	0	0	2.20931	0				94.583	43.3497	35.9649	17.6744
2017-08-04	1	265.117	0	0	0	0				265.117	344.652	410.931	0
	2	503.722	0	0	0	0				914.652	198.837	0	0
	3	689.303	0	0	0	0				888.141	185.582	0	0
	4	371.163	0	0	0	0				344.652	437.442	119.302	0
	5	530.233	0	0	0	0				53.0233	689.303	159.07	0
	6	437.442	39.7675	13.2558	0	0				278.372	251.861	0	0
2017-08-04	mean	466.163	6.62792	2.20931	0	0				457.326	351.28	114.884	0
	SE	59.323	0	0	0	0				146.045	77.9544	65.6279	0
2017-08-23	1	251.861	0	0	0	0				0	0	0	0
	2	570.001	0	0	0	0				0	13.2558	0	0
	3	729.071	0	0	0	0				0	66.2792	0	0
	4	477.21	0	0	0	0				26.5117	0	0	0
	5	609.768	0	0	0	0				26.5117	0	0	0
	6	450.698	92.7908	26.5117	0	0				0	39.7675	0	0
2017-08-23	mean	514.768	15.4651	4.41861	0	0				8.83722	19.8837	0	0
	SE	66.4924	0	0	0	0				5.58915	11.2219	0	0
2017-11-04	1	238.605	0	0	0	0				13.2558	0	0	0
	2	583.257	0	0	0	0				39.7675	13.2558	0	0
	3	742.327	0	0	0	0				0	39.7675	0	0
	4	357.907	0	0	0	0				39.7675	0	0	0
	5	530.233	0	0	0	0				39.7675	0	0	0
	6	543.489	159.07	26.5117	0	0				159.07	39.7675	0	0
2017-11-04	mean	499.303	26.5117	4.41861	0	0				48.6047	15.4651	0	0
	SE	72.3358	0	0	0	0				23.1292	7.96576	0	0
2018-04-17	1	0	0	0	0	0				0	0	0	0
	2	0	0	0	0	0				0	0	0	0
	3	89	0	0	0	0				66.2792	0	13.2558	0
	4	128	0	0	0	0				0	39.7675	0	0
	5	97	0	0	0	0				79.535	0	0	0
	6	0	132.558	0	0	0				0	212.093	0	0
2018-04-17	mean	52.3333	22.0931	0	0	0				24.3024	41.9768	2.20931	0
	SE	24.0009	0	0	0	0				15.4651	34.6375	2.20931	0
2018-05-28	1	583.257	66.2792	0	0	0				609.768	371.163	0	0
	2		0	0	0	0				0	0	0	0
	3		0	0	0	0				450.698	0	26.5117	0
	4		0	0	0	0				0	0	0	0
	5		0	0	0	0				0	0	0	0
	6	516.977	172.326	13.2558	0	0				0	39.7675	53.0233	0
2018-05-28	mean	550.117	39.7675	2.20931	0	0				176.744	68.4885	13.2558	0
	SE	33.1396	28.6359	2.20931	0	0				113.654	60.8823	9.05546	0
2018-09-17	1	404	0	0	0	0				477.21	0	0	0
	2	388	0	0	0	0				92.7908	0	0	0
	3	0	0	0	0	0				0	0	0	0
	4	452	0	0	0	0				0	265.117	0	0
	5	480	66.2792	0	0	0				185.582	0	0	0
	6	484	172.326	0	0	0				0	119.302	0	0
2018-09-17	mean	368	39.7675	0	0	0				125.93	64.0698	0	0
	SE	75.3162	28.6359	0	0	0				76.5134	44.6804	0	0
2018-11-09	1	377		0	0	0				665.443	0	0	0
	2	270		0	0	0				178.954	0	0	0
	3			0	0	0					0	0	0
	4			0	0	0					465.28	0	0
	5	377	56.3	0	0	0				342	0	0	0
	6		156.5	0	0	0					0	0	0
2018-11-09	mean	341.333	106.4	0	0	0				395.466	77.5466	0	0
	SE	35.6667	50.1	0	0	0				142.959	77.5466	0	0

## Sheet: Fig3
				Mowing in June						Mowing in August
				the average plant height of about ten plants						the average plant height of about ten plants
				averaged height (cm)						averaged height (cm)
Date	replicate			0cm	10cm	20cm	30cm	40cm		10cm	20cm	30cm	40cm
2017-04-24	1			5.2
	2			9.4
	3			5.7
	4			7
	5			7.8
	6			10.2
2017-05-10	1						20	18				28	22
	2			12	13	13	15	16		15	14	16	19
	3			15	14	16	15	15		16	14	13	17
	4			25	21	16	21	22		22	25	20	19
	5			15	19	19	20	20		21	19	24	24
	6			12	22	25	16	17		25	21	16	20
2017-05-10	mean			15.8	17.8	17.8	17.8333	18		19.8	18.6	19.5	20.1667
	SE			2.39583	1.82757	2.0347	1.13774	1.06458		1.88149	2.11187	2.30579	1.01379
2017-06-11	1			29.4444	33.7692	46.4545	29.8333	26.1429		36.7692	35.4	51.2857	36.2857
	2			19	24.6364	21.5	32.4	26.8571		24.1818	24	23.3333	24.6667
	3			18.5556	22.875	33.875	21.2	23.7143		27	22.3333	17	29
	4			30.3333	31.5	27	36.2222	41.7143		35	45.5714	38.2	29.5
	5			18.25	23.2857	31.5	35.1429	30.6667		25.625	18.375	47.2857	31.4
	6			25.9091	34.6	38.4444	21.75	20		35.3	37	21.625	17.4286
2017-06-11	mean			23.5821	28.4444	33.129	29.4247	28.1825		30.646	30.4466	33.1216	28.0468
	SE			2.30979	2.21896	3.5676	2.67376	3.06657		2.29783	4.27922	5.89982	2.62244
2017-07-08	1						25
	2
	3
	4
	5			23.125	12.5					35.75	15.6667	67.6667	13.6
	6			49.1667	27.5	16.5				53.6667	27.75	15.3333
2017-07-08	mean			36.1458	20	16.5	25			44.7083	21.7083	41.5	13.6
	SE			13.0208	7.5					8.95833	6.04167	26.1667
2017-08-04	1			62							69.3	65.9
	2			51.5						63.6	48.6364
	3			41.5						51.4286	38.6
	4			69.5						55.4	69	34
	5			43.5						31.3333	49.1	45
	6			65.5556	53.6667	39				77.2857	82
2017-08-04	mean			55.5926	53.6667	39	0	0		55.8095	59.4394	48.3	0
	SE			4.81426	0	0	0	0		7.55104	6.72187	9.35539	0
2017-08-23	1			82.6
	2			62.7143						18.5	24
	3			53.4286							18.75
	4			86.6667						15.5
	5			73.4286						11.5
	6			96.3333	24.1429	16.75					25.5
2017-08-23	mean			75.8619	24.1429	16.75	0	0		15.1667	22.75	0	0
	SE			6.48912	0	0	0	0		2.02759	2.04634	0	0
2017-11-04	1			96.6667						16
	2			78.6667						27	31
	3			81.5							24
	4			107.8						18.6667
	5			96.6667						40.3333
	6			97.3333	89.8	63.5
2017-11-04	mean			93.1056	89.8	63.5	0	0		25.5	27.5	0	0
	SE			4.48083	0	0	0	0		5.47131	3.5	0	0
2018-04-17	1
	2
	3			11.2667						8
	4			9.06							11
	5			13.7333						6.575
	6			8.18							14.55
2018-04-17	mean			10.56	0	0	0	0		7.2875	12.775		0
	SE			1.2411	0	0	0	0		0.7125	1.775	0	0
2018-05-28	1			40.2429	9.08		0	0		40.2429	16.3	33.5833	0
	2						0	0					0
	3						0	0			6.975		1
	4						0	0					0
	5						0	0					0
	6			37.2286	27.5222	12.3	0	0		27.5222		26.3333	3.8
2018-05-28	mean			38.7357	18.3011	12.3	0	0		33.8825	11.6375	29.9583	0.8
	SE			1.50714	9.22111		0	0		6.36032	4.6625	3.625	0.621825
2018-09-17	1			156.889	0	0	0	0		66.9091	0	0	0
	2			145.9	0	0	0	0		76.7143	0	0	0
	3						0	0				0	0
	4			150.7	0	0	0	0			96.8	0	0
	5			142.222	48.8	0	0	0		118.5	0	0	0
	6			167.75	137.111	0	0	0			71.625	0	0
2018-09-17	mean			152.692	37.1822	0	0	0		87.3745	33.685	0	0
	SE			4.49485	26.7098	0	0	0		15.8181	21.0083	0	0
2018-11-09	1			160.3		0	0	0		140.3		0	0
	2			158.9		0	0	0		138.5		0	0
	3					0	0	0				0	0
	4					0	0	0			145.6	0	0
	5			150	138.1	0	0	0		146.8		0	0
	6				150.5	0	0	0			137.3	0	0
2018-11-09	mean			156.4	144.3	0	0	0		141.867	141.45	0	0
	SE			3.22542	6.2	0	0	0		2.5208	4.15	0	0

## Sheet: Fig4
date	treatment	date	density (stems/m2)	height (cm)
2018-06-09
	stubble heigh 5cm，waterlogging 30cm	W1	300	62.7
	stubble heigh 5cm，waterlogging 30cm	W2	208	54.8182
	stubble heigh 5cm，waterlogging 30cm	W3	236	58.2727
	stubble heigh 10 cm，waterlogging 30cm	W4	252	84.5
	stubble heigh 10 cm，waterlogging 30cm	W5	248	72.4
	stubble heigh 10 cm，waterlogging 40 cm	W6	296	76.5
	stubble heigh 10 cm，waterlogging 40 cm	W7	400	82.1
	stubble heigh 10 cm，waterlogging 40 cm	W8	256	57.2
2018-06-23
	stubble heigh 5cm，waterlogging 0 cm	W1 CK	16	14.6
	stubble heigh 5cm，waterlogging 0 cm	W2 CK	16	32.5
	stubble heigh 5cm，waterlogging 0 cm	W3 CK	76	16.0909
	stubble heigh 10 cm，waterlogging 0 cm	W4 CK	4	23
	stubble heigh 10 cm，waterlogging 0 cm	W5 CK	16	21.5
	stubble heigh 10 cm，waterlogging 0 cm	W6 CK	16	16
	stubble heigh 10 cm，waterlogging 0 cm	W7 CK	24	19.6667
	stubble heigh 10 cm，waterlogging 0 cm	W8 CK	52	21.6
	stubble heigh 5cm，waterlogging 30cm	W1	0	0
	stubble heigh 5cm，waterlogging 30cm	W2	0	0
	stubble heigh 5cm，waterlogging 30cm	W3	0	0
	stubble heigh 10 cm，waterlogging 30cm	W4	0	0
	stubble heigh 10 cm，waterlogging 30cm	W5	0	0
	stubble heigh 10 cm，waterlogging 40 cm	W6	0	0
	stubble heigh 10 cm，waterlogging 40 cm	W7	0	0
	stubble heigh 10 cm，waterlogging 40 cm	W8	0	0
2018-07-25
	stubble heigh 5cm，waterlogging 0 cm	W1 CK	20	30.2
	stubble heigh 5cm，waterlogging 0 cm	W2 CK	8	39
	stubble heigh 5cm，waterlogging 0 cm	W3 CK	104	17.7
	stubble heigh 10 cm，waterlogging 0 cm	W4 CK	8	37.5
	stubble heigh 10 cm，waterlogging 0 cm	W5 CK	24	33.6667
	stubble heigh 10 cm，waterlogging 0 cm	W6 CK	24	17.4286
	stubble heigh 10 cm，waterlogging 0 cm	W7 CK	32	37.375
	stubble heigh 10 cm，waterlogging 0 cm	W8 CK	64	31.7
	stubble heigh 5cm，waterlogging 30cm	W1	0	0
	stubble heigh 5cm，waterlogging 30cm	W2	0	0
	stubble heigh 5cm，waterlogging 30cm	W3	0	0
	stubble heigh 10 cm，waterlogging 30cm	W4	0	0
	stubble heigh 10 cm，waterlogging 30cm	W5	0	0
	stubble heigh 10 cm，waterlogging 40 cm	W6	0	0
	stubble heigh 10 cm，waterlogging 40 cm	W7	0	0
	stubble heigh 10 cm，waterlogging 40 cm	W8	0	0
2018-08-25
	stubble heigh 5cm，waterlogging 0 cm	W1 CK	28	40.7143
	stubble heigh 5cm，waterlogging 0 cm	W2 CK	16	40.5
	stubble heigh 5cm，waterlogging 0 cm	W3 CK	84	40.9
	stubble heigh 10 cm，waterlogging 0 cm	W4 CK	12	57
	stubble heigh 10 cm，waterlogging 0 cm	W5 CK	16	71.5
	stubble heigh 10 cm，waterlogging 0 cm	W6 CK	24	61.3333
	stubble heigh 10 cm，waterlogging 0 cm	W7 CK	48	53.5
	stubble heigh 10 cm，waterlogging 0 cm	W8 CK	84	81.6
	stubble heigh 5cm，waterlogging 30cm	W1	0	0
	stubble heigh 5cm，waterlogging 30cm	W2	0	0
	stubble heigh 5cm，waterlogging 30cm	W3	0	0
	stubble heigh 10 cm，waterlogging 30cm	W4	0	0
	stubble heigh 10 cm，waterlogging 30cm	W5	0	0
	stubble heigh 10 cm，waterlogging 40 cm	W6	0	0
	stubble heigh 10 cm，waterlogging 40 cm	W7	0	0
	stubble heigh 10 cm，waterlogging 40 cm	W8	0	0
2018-09-17
	stubble heigh 5cm，waterlogging 0 cm	W1 CK	28	68.1429
	stubble heigh 5cm，waterlogging 0 cm	W2 CK	24	51
	stubble heigh 5cm，waterlogging 0 cm	W3 CK	60	91.7143
	stubble heigh 10 cm，waterlogging 0 cm	W4 CK	16	73.25
	stubble heigh 10 cm，waterlogging 0 cm	W5 CK	28	65
	stubble heigh 10 cm，waterlogging 0 cm	W6 CK	24	72.5714
	stubble heigh 10 cm，waterlogging 0 cm	W7 CK	52	97.4444
	stubble heigh 10 cm，waterlogging 0 cm	W8 CK	60	122.625
	stubble heigh 5cm，waterlogging 30cm	W1	0	0
	stubble heigh 5cm，waterlogging 30cm	W2	0	0
	stubble heigh 5cm，waterlogging 30cm	W3	0	0
	stubble heigh 10 cm，waterlogging 30cm	W4	0	0
	stubble heigh 10 cm，waterlogging 30cm	W5	0	0
	stubble heigh 10 cm，waterlogging 40 cm	W6	0	0
	stubble heigh 10 cm，waterlogging 40 cm	W7	0	0
	stubble heigh 10 cm，waterlogging 40 cm	W8	0	0
2018-11-09
	stubble heigh 5cm，waterlogging 0 cm	W1 CK	260	65
	stubble heigh 5cm，waterlogging 0 cm	W2 CK	386.667	96.6667
	stubble heigh 5cm，waterlogging 0 cm	W3 CK	399.6	99.9
	stubble heigh 10 cm，waterlogging 0 cm	W4 CK	340	85
	stubble heigh 10 cm，waterlogging 0 cm	W5 CK	369	92.25
	stubble heigh 10 cm，waterlogging 0 cm	W6 CK	336.667	84.1667
	stubble heigh 10 cm，waterlogging 0 cm	W7 CK	429.143	107.286
	stubble heigh 10 cm，waterlogging 0 cm	W8 CK	459.333	114.833
	stubble heigh 5cm，waterlogging 30cm	W1	0	0
	stubble heigh 5cm，waterlogging 30cm	W2	0	0
	stubble heigh 5cm，waterlogging 30cm	W3	0	0
	stubble heigh 10 cm，waterlogging 30cm	W4	0	0
	stubble heigh 10 cm，waterlogging 30cm	W5	0	0
	stubble heigh 10 cm，waterlogging 40 cm	W6	0	0
	stubble heigh 10 cm，waterlogging 40 cm	W7	0	0
	stubble heigh 10 cm，waterlogging 40 cm	W8	0	0

## Sheet: Fig5
		mowing in June							mowing in June						mowing in August					mowing in August
2017 spike		Density (spikes/m2)							lengh (cm)						Density (spikes/m2)					length (cm)
	1	119.302	0	0	0	0			15.6						0	0	0	0
	2	238.605	0	0	0	0			13.2857						0	0	0	0
	3	278.372	0	0	0	0			11.8333						0	0	0	0
	4	251.861	0	0	0	0			19.8571						0	0	0	0
	5	172.326	0	0	0	0			15.5						0	0	0	0
	6	212.093	39.7675	13.2558	0	0			19.125	19	6				39.7675	0	0	0		21.5
	mean	212.093	6.62792	2.20931	0	0			15.8669	19	6	0	0		6.62792	0	0	0		21.5	0	0	0
	SE	23.7128	6.62792	2.20931	0	0			1.2868	0	0	0	0		6.62792	0	0	0		0	0	0	0
the rate of spike	1	0.5
	2	0.409091
	3	0.375
	4	0.703704
	5	0.325
	6	0.390244	0.25	0.5											0.25	0
	mean	0.450506	0.25	0.5											0.25	0
	SE	0.0557848
		mowing in June							mowing in June						mowing in August					mowing in August
2018,		Density (spikes/m2)							lengh (cm)						Density (spikes/m2)					length (cm)
	1	198.837	0	0	0	0			18.6						331.396	0	0	0
	2	238.605	0	0	0	0			15.1429						92.7908	0	0	0
	3		0	0	0	0									0	0	0	0
	4		0	0	0	0									0	198.837	0	0
	5	172.326	26.5117	0	0	0			23	13.5					172.326	0	0	0
	6		66.2792	0	0	0				19.125					0	0	0	0		21.5
	mean	203.256	15.4651	0	0	0			18.9143	16.3125	0	0	0		99.4187	33.1396	0	0		21.5	0	0	0
	SE	19.2603	11.0465	0	0	0			2.2736	0	0	0	0		54.4135	33.1396	0	0		0	0	0	0
the rate of spike	1	0.52742													0.498008
	2	0.883722													0.518519
	3
	4															0.42735
	5	0.457098	0.4709												0.503876
	6		0.423509	0
	mean	0.622747	0.447204	0	0	0									0.506801	0.42735	0	0
	SE	0.132057	0.0236954		0	0									0.00609882		0	0

## Sheet: Fig6
	density (stem/m2)
	10cm waterlogging				20 cm waterlogging
	W1-1	W1-2	W1-3	W1-4	W20-20	W20-2	W20-3	W20-4
2017-05-26	119.302	92.7908	172.326	251.861	119.302	251.861	106.047	132.558
2017-06-10	106.047	79.535	172.326	198.837	119.302	238.605	106.047	119.302
2017-07-08	0	0	0	0	0	0	0	0

## Sheet: Fig7
	Mowing and tilling						Mowing and tilling						CK						CK
Date	cloned ramets (stems/m2)						Density of seedlings（stems/m2）						cloned ramets (stems/m2)						Density of seedlings（stems/m2）
	plot 1	plot 2	plot 3	plot 4	plot 5		plot 1	plot 2	plot 3	plot 4	plot 5		plot 1	plot 2	plot 3	plot 4	plot 5	plot 6	plot 1	plot 2	plot 3	plot 4	plot 5	plot 6
2017-05-11	3	3	3	1	2		19	16	14	12	0		335	205	579	605	391	434	24	9	7	16	38	8
2017-05-24	4	3	6	1	2		12	13	11	13	0		247	401	504	500	392	407	18	9	8	15	34	2
2017-06-11	4	3	3	1	2		12	8	16	10	0		143	256	366	296	388	320	11	9	7	18	35	0
2017-07-08	25	23	37	22	2								154	265	373	314	423	320
2017-08-04	81	84	91	50	5								200	331	400	310	284	241
2017-08-26	171	167	177	64	20								155	298	351	299	290	204
2017-11-04	256	206	222	180	52								171	378	422	380	414	335
2018-05-28	221	137	194	209	162		215.75	173	164.75	239.5	188.75		164	220			165
2018-06-23	172	279	138	110	151		64	136	7	397	471		200	351			233
2018-07-25	125	110		152			230	161		75			164	236			140
2018-08-25	125	413	279	180	281								326				225
2018-09-17			288		311								388	395	287		229	232
2018-11-09	365	267			445								377				270	377

## Sheet: Fig8
	Mowing and tilling						Mowing and tilling						CK							CK
Date	Height of cloned ramets（cm）						Height of seedlings（cm）						Height of cloned ramets（cm）							Height of seedlings（cm）
	plot 1	plot 2	plot 3	plot 4	plot 5		plot 1	plot 2	plot 3	plot 4	plot 5		plot 1	plot 2	plot 3	plot 4	plot 5	plot 6		plot 1	plot 2	plot 3	plot 4	plot 5	plot 6
2017-05-11	5	5	3.5	6	6		2	2	2	2			15.2	23.8	15.3333	24.6667	20.5	24.5		3	3	3	3	3	2
2017-05-24	10.25	8.66667	8	10	12.5		5	3.16667	4.5	1.925			35.1429	23.1667	25.6667	27.75	28.1429	31.8571		3.11429	4.33333	4.16667	3.82857	4.7625	2
2017-06-11	14	11.3333	15.5	17.5	20		6.4	6	8	6.2			37.7143	22.4286	30.1538	40.75	34.25	41.6667		4.6	4.5	5	5.88889	8.9
2017-07-08	20.7	19.1	22.5556	16	44.5								45.6364	34.5	52.9167	59.5455	56.6154	57.75
2017-08-04	42.5	25.5	38.2	29.4	65								69.4	48.8	68.7	66.6	90.2	84
2017-08-26	58	47.8182	70.5556	30.625	55.4444								77.4286	77.75	102.308	112.615	114.615	88.375
2017-11-04	86.2222	71.9091	87.375	64.7778	83								102.538	92.8333	124.2	104.4	113	97.3
2018-05-28	34.3727	38.6727	35.0818	39.6333	30.75		7.8	7.46667	7.53333	8.075	7.21111		39.3833	39.3633			45.9381			8.8	7.31111	7.15556	7.77778	6.92222
2018-06-23	49.5	55.5	69.45	58	51		11.4	11.8	9.57143	11.5	10.65		67.5	69.6667			78.1429			10.81	10.33	10.56	11.2	11.56	15
2018-07-25	83.1429	80.7143		96.8			23.2857	22.2857		30.9			98	95.2			108.1			28	24.8889			19.1
2018-08-25	114.571	117.333	120	139	125.625								112.333				127.667
2018-09-17			130		140.889								134	130.6	152.3		140.4	137.3
2018-11-09	131.8	135.778			151.667								126.571				147.75	148

## Sheet: Fig9
2017	plot 1	plot 2	plot 3	plot 4	plot 5
spike density (spikes/m2) in mowing+tilling	59	43	56	12	7
spike length （cm）in mowing+tilling	17.3333	15.7778	16.5	18.8	17.3333
Spike rate in mowing+tilling	0.230469	0.208738	0.252252	0.0666667	0.134615
spike density (spikes/m2) in CK	114	152	180	182	180
spike rate in CK	0.609626	0.337029	0.458015	0.505556	0.512821
spike length in CK	22.2222	16.5556	19.1429	20.9091	20.4
2018	plot 1	plot 2	plot 3	plot 4	plot 5
spike density (spikes/m2) in mowing+tilling	141	127			138
spike length （cm）in mowing+tilling	22.1667	21.8333			25.8571
Spike rate in mowing+tilling	0.386301	0.475655			0.310112
spike density (spikes/m2) in CK	117	73			106
spike rate in CK	0.310345	0.27037			0.281167
spike length in CK	22.125	23.1429			21.1667

## Sheet: Fig10
herbicide	2018/6/	height (cm)	density(stems/m2)		2018-07-26	height (cm)	density(stems/m2)		2018-08-11	height (cm)	density(stems/m2)		2018-08-24	height (cm)	density(stems/m2)		2018-11-08	height (cm)	density(stems/m2)
4 kg/ha	G1-1	51.275	196		G1-1	46.2727	264		G1-1	77	252		G1-1	91.5	188		G1-1	87.5	188
glyphosate	G1-2	50.525	252		G1-2	41.7273	232		G1-2	79.6	244		G1-2	80.9	148		G1-2	78	240
	G1-3	43.3375	312		G1-3	46.3636	128		G1-3	78	188		G1-3	91.7	144		G1-3	86.3333	172
8 kg/ha	G2-1	50.6125	216		G2-1	42	232		G2-1	65.8	168		G2-1	65.8	168		G2-1	72.1667	204
glyphosate	G2-2	44.5125	308		G2-2	48	188		G2-2	61.3	120		G2-2	61.3	120		G2-2	72.5	164
	G2-3	50.075	204		G2-3	53.9091	296		G2-3	80.5	160		G2-3	80.5	160		G2-3	76	180
0.15 kg/ha	H1-1	57.5	208		H1-1	33.6667	24		H1-1	80	36		H1-1	48.8571	28		H1-1	61.6667	84
haloxyfop-r-methyl	H1-2	58.8125	236		H1-2	43	4		H1-2	84.3			H1-2	55.7	84		H1-2	76.5	80
	H1-3	49.875	276		H1-3	26.1429	28		H1-3	81.1	92		H1-3	63.75	16		H1-3	86.75	132
0.3 kg/ha	H2-1	48.75	268		H2-1		0		H2-1		0		H2-1	44	16		H2-1		0
haloxyfop-r-methyl	H2-2	46.75	196		H2-2	41.5	8		H2-2	49	12		H2-2		0		H2-2	61	8
	H2-3	42.75	288		H2-3	52	4		H2-3		0		H2-3	49.4	20		H2-3	71.5	8
0.45 kg/ha	H3-1	25.875	392		H3-1		0		H3-1		0		H3-1		0		H3-1	62.5	0.8
haloxyfop-r-methyl	H3-2	45.375	180		H3-2		0		H3-2	42	3.2		H3-2	35	4		H3-2	45	1
	H3-3	40.25	276		H3-3	20	0.8		H3-3		0		H3-3	41.5	4.8		H3-3	58.3333	2
none herbicide	CK1	34.326	252		CK1	67.4	336		CK1	88.2	368		CK1	120.9	168		CK1	126	208
	CK2	47.258	220		CK2	72.8	160		CK2	86.5	188		CK2	93.1	232		CK4	129.667	216
	CK3	41.125	296		CK3	78.3	212		CK3	95.4	248		CK3	96.3	180		CK8	150.2	260
					CK4	88.2	236		CK4	99	424		CK4	101.1	264		CK11	134	236
					CK5	81.5	188		CK5	92.9	204		CK5	103.2	168		CK12	123.8	272
					CK6	68.5	176		CK6	80.6	156		CK6	110.9	192
					CK7	76.6	124		CK7	81.5	164		CK7	90.8	212
					CK8	68.8	240		CK8	86.2	272		CK8	107.9	184
					CK9	67.3	256		CK9	83.4	236		CK9	98.3	240
					CK10	85.6	144		CK10	90.8	132		CK10	92.1	236
					CK11	68	180		CK11	85.2	196		CK11	95.6	168
					CK12	91.1	216		CK12	90.9	228		CK12	102.3	224

## Sheet: Fig 11
herbicide	2018-11-08	spike number	spike density(spikes/m2)	spike length (cm)
4 kg/ha	G1-1	48	48	20.8333
glyphosate	G1-2	29	29	15.8333
	G1-3	33	33	18.2
8 kg/ha	G2-1	31	15.5	22
glyphosate	G2-2	17	8.5	18
	G2-3	20	10	20.8
0.15 kg/ha	H1-1	2	8	18.5
haloxyfop-r-methyl	H1-2	2	8	21
	H1-3	7	28	19.2
0.3 kg/ha	H2-1	0	0
haloxyfop-r-methyl	H2-2	1	4	10
	H2-3	2	8	19
0.45 kg/ha	H3-1	0.2	0.8	7
haloxyfop-r-methyl	H3-2	0.2	0.8	9
	H3-3	0	0
none herbicide	CK1	18	72	20.3333
	CK4	20	80	23.5
	CK8	29	116	22.6667
	CK11	24	96	23.8333
	CK12	35	140	21
